# Supplementary material for: Capturing electronic substituent effect with effective atomic orbitals
Source: Royal Society of Chemistry journal article supplement (doi:10.1039/d5cp01299f), 2025-01-01
Supplement: d5cp01299f2.xlsx [file d5cp01299f2.xlsx]

## Sheet: mono-substituted
	ipso carbon				orto carbon				orto carbon				meta carbon				meta carbon				para carbon				X
C6H5-X	2s	2pC-C	2pC-X	2pz	2s	2pC-X	2pC-C	2pz	2s	2pC-X	2pC-C	2pz	2s	2pC-X	2pC-C	2pz	2s	2pC-X	2pC-C	2pz	2s	2pC-X	2pc-c	2pz	sigma type	F	Boyd electronegativity	R	R+	R-	R*
I	0.5794	0.3928	0.3766	0.4442	0.5301	0.376	0.3555	0.4106	0.5301	0.376	0.3555	0.4106	0.5316	0.3756	0.3668	0.4082	0.5316	0.3756	0.3668	0.4082	0.5283	0.371	0.367	0.4086		0.42		-0.24	-0.28	-0.15	-0.28
Br	0.5493	0.394	0.3326	0.4381	0.5288	0.3753	0.3526	0.4108	0.5288	0.3753	0.3526	0.4108	0.5314	0.3758	0.3668	0.4081	0.5314	0.3758	0.3668	0.4081	0.5275	0.3704	0.3666	0.4096		0.45		-0.22	-0.3	-0.2	-0.3
SH	0.5487	0.39	0.3666	0.428	0.5253	0.3716	0.3534	0.4212	0.5267	0.3736	0.3556	0.4193	0.5308	0.3756	0.3676	0.4083	0.5302	0.3749	0.3674	0.4074	0.5266	0.3686	0.3657	0.4149	0.4377	0.3	2.65	-0.15	-0.33		-0.33
Cl	0.5284	0.3896	0.2865	0.4254	0.5284	0.375	0.352	0.4121	0.5284	0.375	0.352	0.4121	0.5312	0.3758	0.367	0.4081	0.5312	0.3758	0.367	0.4081	0.5275	0.3701	0.3664	0.4107		0.42		-0.19	-0.31	-0.23	-0.31
SiH3	0.705	0.3719	0.4243	0.4252	0.5346	0.3762	0.3715	0.4085	0.5346	0.3762	0.3715	0.4085	0.5303	0.3726	0.3694	0.4083	0.5303	0.3726	0.3694	0.4083	0.5314	0.3729	0.3722	0.406	0.1904	0.06	1.9	0.04	0.08		0.04
CF3	0.5129	0.3758	0.335	0.4196	0.5327	0.3791	0.3637	0.4036	0.5328	0.3791	0.3637	0.4036	0.5296	0.3741	0.3665	0.4065	0.5296	0.3741	0.3665	0.4065	0.5312	0.3739	0.3705	0.4029	0.4949	0.38	2.71	0.16	0.23	0.27	0.27
COOH	0.5132	0.372	0.3464	0.4159	0.5357	0.3799	0.3686	0.3991	0.539	0.3835	0.369	0.3965	0.5297	0.3737	0.3672	0.4084	0.5289	0.3724	0.367	0.4071	0.5334	0.3756	0.3731	0.4007	0.4704	0.34	2.63	0.11	0.08	0.43	0.43
COOCH3	0.5153	0.3716	0.35	0.4153	0.5353	0.3794	0.3682	0.4002	0.5375	0.3816	0.3682	0.3969	0.5286	0.3718	0.3674	0.4086	0.5295	0.3725	0.3683	0.4083	0.5335	0.3764	0.3723	0.4021	0.4664	0.34	2.64	0.11	0.15	0.41	0.41
CN	0.5026	0.3722	0.3092	0.4147	0.5345	0.3798	0.3612	0.403	0.5345	0.3798	0.3612	0.403	0.5302	0.3751	0.3666	0.4055	0.5302	0.3751	0.3666	0.4055	0.5322	0.3752	0.3704	0.4007	0.5225	0.51	2.69	0.15	0.15	0.49	0.49
H	0.5294	0.37	0.371	0.4094	0.53	0.3724	0.3698	0.4097	0.53	0.3724	0.3698	0.4097	0.53	0.3724	0.3698	0.4097	0.53	0.3724	0.3698	0.4097	0.5294	0.371	0.37	0.4094		0		0	0	0	0
COCH3	0.5204	0.3666	0.3618	0.4093	0.5334	0.3751	0.3736	0.4046	0.54	0.3853	0.3694	0.3945	0.529	0.3728	0.367	0.4091	0.5298	0.3729	0.3684	0.407	0.5337	0.376	0.3729	0.4012	0.4378	0.33	2.59	0.17		0.51	0.51
COH	0.5178	0.3651	0.3634	0.4076	0.5359	0.3776	0.3751	0.4018	0.539	0.3827	0.3707	0.3949	0.5288	0.3718	0.3667	0.4077	0.5296	0.373	0.3674	0.4056	0.5353	0.3785	0.3728	0.3993	0.4402	0.33	2.6	0.09	0.4	0.7	0.7
NO2	0.5054	0.3745	0.2288	0.4067	0.5375	0.3836	0.3582	0.3962	0.5375	0.3836	0.3582	0.3962	0.5296	0.3745	0.3643	0.4053	0.5296	0.3745	0.3643	0.4053	0.5337	0.3768	0.3719	0.3984	0.6555	0.65	3.22	0.13	0.14	0.62	0.62
CHCH2	0.5158	0.3674	0.3615	0.4008	0.5316	0.3726	0.3689	0.411	0.5293	0.3724	0.3679	0.4106	0.5293	0.372	0.3693	0.409	0.5296	0.3722	0.3695	0.4087	0.5309	0.3731	0.3701	0.4098	0.4424	0.13	2.58	-0.17	-0.29		-0.29
C6H5	0.5171	0.3684	0.361	0.4003	0.5311	0.3732	0.368	0.4116	0.5311	0.3732	0.368	0.4116	0.5302	0.3736	0.3693	0.4093	0.5302	0.3736	0.3693	0.4093	0.5289	0.3703	0.369	0.4097	0.4417	0.12	2.58	-0.13	-0.3	-0.1	-0.3
CH3	0.5208	0.3693	0.3633	0.3942	0.5293	0.3701	0.3679	0.416	0.5293	0.3701	0.3679	0.416	0.5302	0.373	0.3703	0.4097	0.5302	0.373	0.3703	0.4097	0.5279	0.3691	0.3687	0.4127	0.4462	0.01	2.55	-0.18	-0.32	-0.18	-0.32
CH2CH3	0.5228	0.3671	0.367	0.3921	0.5295	0.37	0.3689	0.4144	0.5295	0.37	0.3689	0.4144	0.5301	0.3726	0.3703	0.4098	0.5301	0.3726	0.3703	0.4098	0.5282	0.3695	0.3687	0.4126	0.4377	0	2.55	-0.15	-0.3	-0.19	-0.3
NHCOCH3	0.492	0.362	0.2102	0.3773	0.5262	0.3732	0.3551	0.4228	0.5245	0.3737	0.3532	0.4164	0.5301	0.3753	0.3674	0.4069	0.5302	0.375	0.3679	0.4075	0.5268	0.3692	0.365	0.4142		0.31		-0.31	-0.91	-0.77	-0.91
NMe2	0.4905	0.3619	0.2125	0.3656	0.5217	0.3699	0.352	0.434	0.5217	0.3699	0.352	0.434	0.5299	0.3748	0.3686	0.4094	0.5299	0.3748	0.3686	0.4094	0.5227	0.3634	0.3631	0.4255	0.6666	0.15	3.13	-0.98	-1.85	-0.27	-1.85
NH2	0.4935	0.3654	0.2185	0.3647	0.5208	0.3679	0.3513	0.4331	0.5208	0.3679	0.3513	0.4331	0.5307	0.3757	0.3688	0.409	0.5307	0.3757	0.3688	0.409	0.5229	0.364	0.3625	0.4244	0.6596	0.08	3.12	-0.74	-1.38	-0.23	-1.38
F	0.4948	0.3551	0.1236	0.3585	0.5272	0.3748	0.3506	0.4199	0.5272	0.3748	0.3506	0.4199	0.5312	0.3767	0.3658	0.4077	0.5312	0.3767	0.3658	0.4077	0.526	0.369	0.3642	0.415		0.45		-0.39	-0.52	-0.48	-0.52
OH	0.491	0.3561	0.1552	0.3516	0.5251	0.3722	0.3513	0.4243	0.5213	0.3695	0.3494	0.4343	0.531	0.3758	0.3686	0.4076	0.5307	0.377	0.366	0.4089	0.5243	0.3663	0.363	0.4209	0.7536	0.33	3.55	-0.7	-1.25	-0.7	-1.25
OCH3	0.4897	0.3532	0.1549	0.3513	0.5226	0.3727	0.3507	0.4319	0.5261	0.3729	0.353	0.4236	0.5297	0.3747	0.3666	0.4095	0.5306	0.375	0.3684	0.4086	0.5249	0.3671	0.3635	0.4207	0.7533	0.29	3.53	-0.56	-1.07	-0.55	-1.07
SCH3	0.5525	0.3896	0.3744	0.4283	0.5242	0.3722	0.3537	0.4223	0.5267	0.3731	0.3563	0.419	0.5299	0.3736	0.3681	0.4091	0.53	0.3738	0.368	0.4084	0.5265	0.3688	0.3655	0.4164	0.4222	0.23	2.65	-0.23	-0.83	-0.17	-0.83
NEt2	0.492	0.3634	0.2123	0.3653	0.5203	0.369	0.3502	0.4337	0.5203	0.369	0.3502	0.4337	0.5303	0.3753	0.3688	0.4097	0.5303	0.3753	0.3688	0.4097	0.5211	0.3617	0.3617	0.4262		0.01		-0.73	-2.08	-0.27	-2.08
NHCH3	0.4918	0.3621	0.2128	0.3616	0.5212	0.3702	0.3508	0.4354	0.5215	0.369	0.3512	0.4347	0.53	0.3744	0.3687	0.4087	0.5306	0.3753	0.3687	0.4098	0.5228	0.3647	0.3614	0.4259	0.6661	0.03	3.13	-0.73	-1.78		-1.78
OCH(CH3)2	0.4895	0.3537	0.1544	0.3516	0.52	0.3695	0.3491	0.4294	0.5266	0.3729	0.3538	0.4239	0.5304	0.3757	0.3671	0.4106	0.5299	0.3741	0.3686	0.409	0.5237	0.3656	0.3634	0.4216		0.34		-0.79	-1.19		-1.19
C6F5	0.5111	0.3725	0.3397	0.4108	0.5317	0.3763	0.3645	0.4062	0.5317	0.3763	0.3645	0.4062	0.5299	0.374	0.3676	0.4079	0.5299	0.374	0.3676	0.4079	0.5309	0.3729	0.3705	0.4059		0.27		0	-0.09	0.11	0.11
OCH2CH2CH3	0.4901	0.3536	0.1549	0.3514	0.5204	0.3702	0.3499	0.4292	0.5257	0.3724	0.3528	0.4237	0.5299	0.3747	0.3669	0.4098	0.5299	0.3737	0.369	0.4082	0.5241	0.3665	0.3632	0.421		0.26		-0.51	-1.09		-1.09
Sn(CH3)3	0.6422	0.365	0.4065	0.408	0.5328	0.3747	0.37	0.4116	0.5324	0.3741	0.3701	0.412	0.5309	0.3721	0.3708	0.41	0.5309	0.3722	0.3707	0.41	0.5294	0.3707	0.3706	0.4088		0.03		-0.03	-0.46		-0.46
C(CF3)3	0.5195	0.381	0.3316	0.4242	0.5321	0.3822	0.3599	0.4033	0.5325	0.3822	0.3605	0.4017	0.5292	0.3743	0.3659	0.407	0.5292	0.3741	0.3661	0.4065	0.5309	0.3731	0.3716	0.4019		0.53		0.02		0.42	0.42
OC6H5	0.4923	0.3555	0.1538	0.3629	0.5266	0.3749	0.3527	0.4199	0.5277	0.3742	0.3541	0.4193	0.5305	0.3751	0.3671	0.4088	0.5305	0.3751	0.3678	0.4084	0.5257	0.3683	0.3644	0.416		0.37		-0.4	-0.87	-0.47	-0.87
COCl	0.5121	0.3726	0.3355	0.4182	0.5393	0.3849	0.3666	0.3947	0.5389	0.3831	0.3671	0.3953	0.5287	0.3724	0.3657	0.406	0.5294	0.3737	0.3658	0.4058	0.5356	0.3787	0.374	0.3967	0.489	0.46	2.66	0.15	0.33	0.78	0.78

## Sheet: meta-disubstituted
	ipso carbon				orto carbon (para COOH)				orto carbon (orto COOH)				meta carbon (ipso COOH)				meta carbon (X and COOH)				para carbon (orto COOH)
C6H5-X	2s	2pC-x	2pC-C	2pz	2s	2pC-X	2pC-C	2pz	2s	2pC-X	2pC-C	2pz	2s	2pC-X	2pC-C	2pz	2s	2pC-X	2pC-C	2pz	2s	2pC-X	2pc-c	2pz	σm	I	IX	IX mono		RX	RX mono	I	IX
I	0.5783	0.3782	0.3898	0.4421	0.5388	0.3828	0.3594	0.4043	0.5427	0.3835	0.3594	0.403	0.5144	0.3478	0.3714	0.4153	0.5358	0.3796	0.3665	0.4088	0.5427	0.3852	0.3669	0.398	0.35	0.733	0.0042	0.006	0.803533	-0.00166667	-0.000666667	0.7379	0.002
Br	0.5486	0.3366	0.3917	0.4371	0.5384	0.384	0.3565	0.405	0.5413	0.381	0.3571	0.4029	0.5146	0.3488	0.371	0.4152	0.5354	0.3788	0.3657	0.4081	0.5429	0.3858	0.3665	0.3991	0.39	0.7314	0.0058	0.006	0.804667	-0.0028	-0.0016	0.7367	0.0032
SH	0.5478	0.3684	0.3874	0.4271	0.5335	0.379	0.3576	0.4152	0.5384	0.3802	0.3604	0.4111	0.5143	0.3483	0.3716	0.4149	0.5354	0.3799	0.3674	0.4088	0.541	0.3816	0.3652	0.4038	0.25	0.7348	0.0024	0.0046	0.820067	-0.0182	-0.0177333	0.739	0.0009
Cl	0.5257	0.2886	0.387	0.424	0.5382	0.3834	0.3565	0.4062	0.5412	0.3815	0.3571	0.4047	0.5139	0.3487	0.3702	0.4146	0.535	0.3797	0.3655	0.4081	0.5421	0.3838	0.3666	0.3997	0.37	0.731	0.0062	0.0056	0.807067	-0.0052	-0.00406667	0.7357	0.0042
SiH3	0.706	0.4214	0.3683	0.4211	0.5429	0.3847	0.3756	0.4023	0.5475	0.3898	0.3707	0.3968	0.514	0.3481	0.3718	0.4157	0.5344	0.3767	0.3686	0.4094	0.5427	0.3856	0.3711	0.3981	0.05	0.7372	0	0.0008	0.798133	0.00373333	0.00386667	0.7404	-0.0005
CF3	0.5116	0.3392	0.3724	0.4175	0.541	0.3859	0.3684	0.3975	0.5472	0.3876	0.3664	0.3927	0.5132	0.35	0.3694	0.4143	0.5343	0.3778	0.3656	0.4072	0.5435	0.3874	0.3699	0.3956	0.43	0.7312	0.006	0.0066	0.790533	0.0113333	0.0124667	0.735	0.0049
COOH	0.5125	0.3492	0.3692	0.4153	0.5478	0.3879	0.3707	0.3911	0.5475	0.3907	0.3723	0.39	0.5126	0.3492	0.3692	0.4153	0.5342	0.3773	0.3662	0.4077	0.5475	0.3907	0.3722	0.39	0.37	0.7324	0.0048	0.0054	0.780733	0.0211333	0.0216667	0.7354	0.0045
COOCH3	0.5138	0.3508	0.37	0.4134	0.5468	0.3899	0.3718	0.3912	0.5493	0.3902	0.3693	0.3886	0.5127	0.3485	0.3696	0.4159	0.5346	0.3782	0.3668	0.4093	0.5442	0.3868	0.372	0.3948	0.37	0.7336	0.0036	0.0039	0.783067	0.0188	0.0197333	0.7364	0.0035
CN	0.501	0.3124	0.3692	0.414	0.5429	0.3869	0.3649	0.3978	0.5466	0.3871	0.3652	0.3957	0.5125	0.3499	0.3694	0.4123	0.5345	0.3788	0.3649	0.4054	0.5472	0.3902	0.3704	0.3909	0.56	0.7298	0.0074	0.0064	0.7896	0.0122667	0.0147333	0.7343	0.0056
H	0.5344	0.3778	0.3679	0.4097	0.539	0.3816	0.3742	0.4032	0.5441	0.3861	0.3703	0.3981	0.5133	0.347	0.3713	0.4161	0.5342	0.3765	0.3686	0.4104	0.542	0.3855	0.3695	0.4015	0	0.7372	0	0	0.801867	0	0	0.7399	0
COCH3	0.5201	0.3656	0.3615	0.4083	0.5423	0.3848	0.3772	0.3997	0.5511	0.3928	0.3705	0.386	0.5134	0.3501	0.3699	0.4143	0.5339	0.377	0.3666	0.4095	0.5468	0.389	0.3721	0.3905	0.38	0.7332	0.004	0.0042	0.784133	0.0177333	0.019	0.7365	0.0034
COH	0.5171	0.3641	0.3624	0.4064	0.5473	0.3902	0.374	0.3888	0.5465	0.3894	0.3749	0.3944	0.5113	0.3479	0.3687	0.4146	0.5355	0.3795	0.3662	0.4062	0.5479	0.3906	0.3729	0.3884	0.35	0.7324	0.0048	0.0055	0.781067	0.0208	0.0218667	0.7349	0.005
NO2	0.5031	0.2324	0.3715	0.4056	0.5471	0.3912	0.3614	0.3911	0.5525	0.3895	0.3619	0.3855	0.5127	0.3517	0.3659	0.4128	0.5348	0.3783	0.3638	0.4064	0.5452	0.389	0.3709	0.3916	0.71	0.7276	0.0096	0.011	0.7788	0.0230667	0.0253333	0.7297	0.0102
CHCH2	0.5149	0.3659	0.3618	0.3989	0.5401	0.3804	0.3737	0.4057	0.5428	0.3851	0.3696	0.399	0.5128	0.3466	0.3712	0.4154	0.5337	0.3769	0.3684	0.41	0.5418	0.3844	0.369	0.4023	0.06	0.7368	0.0004	0.0008	0.804667	-0.0028	-0.00173333	0.7396	0.0003
C6H5	0.5165	0.3625	0.3658	0.399	0.5396	0.3815	0.372	0.4052	0.5422	0.3842	0.3691	0.4033	0.513	0.3469	0.3714	0.4158	0.5345	0.3783	0.3683	0.4095	0.5433	0.3845	0.369	0.399	0.06	0.7366	0.0006	0.001	0.805	-0.00313333	-0.00273333	0.7397	0.0002
CH3	0.5197	0.366	0.3648	0.3921	0.5377	0.378	0.373	0.4089	0.5426	0.3835	0.368	0.4047	0.5135	0.3463	0.3727	0.4166	0.535	0.3784	0.3691	0.4109	0.5405	0.3827	0.3692	0.4047	-0.07	0.7382	-0.001	-0.001	0.8122	-0.0103333	-0.0106	0.7418	-0.0019
CH2CH3	0.5221	0.3685	0.3636	0.3898	0.5387	0.3794	0.3735	0.408	0.5422	0.3836	0.3687	0.4028	0.5133	0.3462	0.372	0.4164	0.5345	0.3772	0.3691	0.411	0.5404	0.3828	0.3689	0.4043	-0.07	0.7382	-0.001	-0.001	0.810067	-0.0082	-0.0084	0.7411	-0.0012
NHCOCH3	0.4892	0.2118	0.3598	0.3761	0.5338	0.3818	0.3578	0.4111	0.5376	0.3782	0.3616	0.4153	0.5137	0.3485	0.3712	0.4139	0.5344	0.3795	0.3664	0.4077	0.5414	0.3825	0.3649	0.4038	0.21	0.7328	0.0044	0.0043	0.820133	-0.0182667	-0.0164	0.7376	0.0023
NMe2	0.4885	0.2127	0.3592	0.3642	0.5305	0.3777	0.3565	0.4278	0.5355	0.3773	0.3572	0.423	0.5141	0.3452	0.3722	0.4159	0.5335	0.3781	0.3685	0.4104	0.5352	0.3766	0.3621	0.418	-0.16	0.737	0.0002	0.0024	0.845867	-0.044	-0.0431333	0.7407	-0.0008
NH2	0.4907	0.2183	0.3615	0.3634	0.5302	0.3765	0.3566	0.4276	0.5327	0.3738	0.3578	0.4255	0.5147	0.3459	0.374	0.416	0.5342	0.3789	0.3681	0.4091	0.5378	0.3792	0.3614	0.4133	-0.16	0.7362	0.001	0.002	0.844267	-0.0424	-0.0412	0.7421	-0.0022
F	0.4919	0.124	0.3524	0.3574	0.5376	0.3838	0.3561	0.4143	0.5389	0.3786	0.3558	0.4118	0.5145	0.3491	0.3707	0.4148	0.5343	0.3792	0.3645	0.4073	0.5414	0.3839	0.3642	0.4037	0.34	0.729	0.0082	0.008	0.819867	-0.018	-0.0173333	0.7352	0.0047
OH	0.4886	0.1555	0.353	0.3509	0.5303	0.3775	0.3549	0.4288	0.5377	0.3775	0.3567	0.4162	0.5145	0.3474	0.3724	0.4145	0.5345	0.3797	0.3663	0.4096	0.5388	0.3804	0.3619	0.4095	0.12	0.7326	0.0046	0.005	0.836333	-0.0344667	-0.0338	0.7387	0.0012
OCH3	0.4866	0.1552	0.3512	0.3512	0.5311	0.3785	0.3561	0.426	0.539	0.3794	0.3594	0.4147	0.5138	0.3465	0.3724	0.4153	0.5348	0.3807	0.366	0.4099	0.5387	0.3794	0.363	0.4098	0.12	0.732	0.0052	0.0046	0.833667	-0.0318	-0.0316	0.7384	0.0015
SCH3	0.5507	0.3754	0.3861	0.4259	0.5362	0.3807	0.3623	0.4123	0.5384	0.3819	0.3584	0.412	0.5136	0.3468	0.3709	0.4156	0.5345	0.3789	0.367	0.4097	0.5386	0.3803	0.3662	0.4082	0.15	0.734	0.0032	0.0035	0.821667	-0.0198	-0.0192667	0.7379	0.002
NEt2	0.4893	0.2136	0.36	0.365	0.5285	0.3762	0.3554	0.4277	0.5315	0.3748	0.3567	0.4255	0.5142	0.3447	0.3737	0.4166	0.5341	0.3791	0.369	0.4104	0.537	0.3773	0.3614	0.4156	-0.23	0.738	-0.0008	0.002	0.845867	-0.044	-0.0432	0.7427	-0.0028
NHCH3		0.2142	0.3601	0.3622	0.5304	0.3766	0.3566	0.4277	0.533	0.3749	0.3568	0.4276	0.5142	0.3457	0.3732	0.4156	0.5338	0.3787	0.3682	0.41	0.5377	0.3786	0.3619	0.4137	-0.21	0.7364	0.0008	0.0022	0.846	-0.0441333	-0.0448	0.7414	-0.0015
OCH(CH3)2	0.4851	0.1547	0.3502	0.3492	0.5293	0.377	0.3552	0.4242	0.5393	0.3793	0.3596	0.4153	0.5139	0.3467	0.3724	0.4158	0.5349	0.3807	0.3668	0.4111	0.5377	0.378	0.3631	0.4107	0.1	0.7336	0.0036	0.0039	0.833467	-0.0316	-0.0307333	0.7392	0.0007
C6F5	0.5096	0.3427	0.3696	0.4087	0.5396	0.3833	0.3685	0.4	0.5451	0.3863	0.3676	0.3952	0.513	0.3492	0.3695	0.4152	0.534	0.3779	0.3663	0.409	0.5421	0.3851	0.3698	0.3987	0.26	0.7326	0.0046	0.0044	0.795933	0.00593333	0.007	0.7358	0.0041
OCH2CH2CH3	0.4854	0.1558	0.3507	0.3496	0.5365	0.3808	0.3598	0.4171	0.5338	0.3767	0.3564	0.4192	0.514	0.3471	0.3702	0.4164	0.5343	0.3791	0.3674	0.4093	0.537	0.3785	0.3639	0.4125	0.1	0.7348	0.0024	0.0037	0.832533	-0.0306667	-0.0300667	0.7376	0.0023
Sn(CH3)3	0.644	0.4039	0.3611	0.4045	0.5414	0.3834	0.3746	0.4051	0.5434	0.3877	0.3698	0.4035	0.5136	0.3452	0.3724	0.4164	0.536	0.3784	0.3696	0.4107	0.5434	0.3853	0.3707	0.3982	0	0.7392	-0.002	-0.0019	0.804533	-0.00266667	-0.0024	0.742	-0.0021
C(CF3)3	0.5181	0.3777	0.335	0.4222	0.5398	0.3879	0.3638	0.3968	0.5437	0.3891	0.364	0.393	0.5117	0.3481	0.3693	0.4135	0.5343	0.3792	0.3651	0.4076	0.5458	0.3877	0.3714	0.392	0.55	0.7302	0.007	0.0076	0.787867	0.014	0.0146	0.7344	0.0055
OC6H5	0.4892	0.1544	0.353	0.36	0.5365	0.3831	0.3576	0.415	0.5423	0.3809	0.3588	0.4094	0.5141	0.3491	0.3697	0.415	0.5342	0.379	0.3657	0.4096	0.5379	0.38	0.365	0.4093	0.25	0.7314	0.0058	0.0047	0.822467	-0.0206	-0.0176	0.7354	0.0045
COCl	0.5104	0.3371	0.3704	0.4167	0.5479	0.3919	0.3704	0.3899	0.5535	0.3926	0.3696	0.3843	0.5121	0.3505	0.3672	0.4128	0.5339	0.3776	0.3647	0.407	0.5462	0.3893	0.3731	0.39	0.51	0.7294	0.0078	0.0081	0.776133	0.0257333	0.0280667	0.7319	0.008

## Sheet: para-disubstituted
	ipso carbon				orto carbon				orto carbon				meta carbon				meta carbon				para carbon (ipso COOH)
C6H5-X	2s	2pC-X	2pC-C	2pz	2s	2pC-X	2pC-C	2pz	2s	2pC-X	2pC-C	2pz	2s	2pC-X	2pC-C	2pz	2s	2pC-X	2pC-C	2pz	2s	2pC-X	2pc-c	2pz	σp		RX
I	0.5834	0.3818	0.396	0.4364	0.5354	0.379	0.3543	0.4108	0.5352	0.3795	0.3551	0.4118	0.5452	0.3876	0.3684	0.3969	0.5428	0.3846	0.3693	0.4002	0.5116	0.3478	0.3695	0.4162	0.18	0.825867	-0.00166667
Br	0.5524	0.3371	0.3966	0.43	0.535	0.3794	0.3527	0.4117	0.5351	0.3796	0.3527	0.4125	0.5447	0.3872	0.3678	0.3963	0.5423	0.3846	0.3685	0.3996	0.5114	0.3477	0.3693	0.4171	0.23	0.827533	-0.00333333
SH	0.5529	0.3715	0.3942	0.4214	0.5292	0.3747	0.3524	0.4215	0.5316	0.3774	0.3546	0.4204	0.5445	0.3879	0.3702	0.397	0.5419	0.385	0.3702	0.3997	0.5081	0.3449	0.3666	0.4208	0.15	0.8418	-0.0176
Cl	0.5309	0.2887	0.392	0.417	0.5349	0.3796	0.3522	0.4131	0.5346	0.3788	0.3523	0.4137	0.5447	0.3872	0.3686	0.3964	0.5423	0.3854	0.3685	0.3996	0.5101	0.3464	0.3681	0.4172	0.23	0.829333	-0.00513333
SiH3	0.7075	0.4273	0.374	0.4146	0.5388	0.3815	0.3699	0.4098	0.5386	0.3812	0.3701	0.4092	0.5422	0.3848	0.3699	0.4008	0.5444	0.387	0.3693	0.3975	0.5144	0.3478	0.3736	0.4132	0.1	0.821467	0.00273333
CF3	0.5163	0.3392	0.3784	0.412	0.5376	0.3824	0.3631	0.4047	0.5383	0.3828	0.3633	0.4043	0.5414	0.3841	0.3677	0.399	0.5437	0.3864	0.367	0.3955	0.5153	0.3499	0.3733	0.4111	0.54	0.8134	0.0108
COOH	0.5172	0.3503	0.3753	0.4092	0.5407	0.3839	0.3674	0.4006	0.5436	0.3863	0.367	0.3969	0.5407	0.3839	0.3674	0.4006	0.5437	0.3863	0.367	0.3969	0.5172	0.3503	0.3753	0.4092	0.45	0.804467	0.0197333
COOCH3	0.5188	0.3535	0.3746	0.4075	0.5401	0.3827	0.3674	0.4011	0.5428	0.3861	0.3667	0.3984	0.5433	0.3866	0.3674	0.3981	0.5407	0.3835	0.368	0.4005	0.5164	0.3497	0.3742	0.4101	0.45	0.8064	0.0178
CN	0.5064	0.3127	0.3755	0.409	0.5397	0.384	0.3599	0.404	0.5398	0.3833	0.361	0.4048	0.5442	0.3864	0.3672	0.3948	0.5418	0.3849	0.367	0.3981	0.5155	0.3511	0.3724	0.409	0.66	0.811867	0.0123333
H	0.5385	0.3804	0.3742	0.4029	0.5342	0.3771	0.3681	0.4095	0.535	0.3784	0.3684	0.4108	0.542	0.3847	0.37	0.4013	0.5447	0.3877	0.3701	0.3985	0.5131	0.3464	0.372	0.416	0	0.8242	0
COCH3	0.5252	0.366	0.3707	0.4028	0.5377	0.3801	0.372	0.4056	0.5444	0.3886	0.3676	0.3957	0.5433	0.3862	0.3676	0.3984	0.5407	0.384	0.3672	0.3993	0.5174	0.3505	0.3752	0.4097	0.5	0.807333	0.0168667
COH	0.5219	0.3673	0.3681	0.4013	0.5403	0.3831	0.3737	0.4038	0.5433	0.3854	0.3685	0.3953	0.5407	0.3822	0.3673	0.3999	0.5447	0.388	0.3671	0.396	0.5183	0.3516	0.3749	0.4076	0.42	0.804467	0.0197333
NO2	0.5093	0.2324	0.3779	0.4019	0.5428	0.3856	0.3565	0.3966	0.5432	0.386	0.3575	0.3975	0.5444	0.3867	0.3655	0.3953	0.542	0.3844	0.3663	0.3987	0.5174	0.3528	0.3736	0.407	0.78	0.800733	0.0234667
CHCH2	0.5196	0.366	0.37	0.3931	0.5367	0.378	0.3688	0.413	0.5336	0.3766	0.3672	0.4118	0.5411	0.3836	0.3703	0.4008	0.5436	0.3874	0.3689	0.3981	0.5125	0.3467	0.371	0.4161	-0.04	0.827267	-0.00306667
C6H5	0.5218	0.3662	0.3721	0.3927	0.5346	0.3772	0.3662	0.4127	0.5346	0.3773	0.3663	0.4121	0.5408	0.3842	0.3699	0.401	0.5435	0.3867	0.3695	0.3978	0.5119	0.3459	0.3711	0.4174	-0.01	0.828133	-0.00393333
CH3	0.5244	0.3675	0.3719	0.3849	0.5341	0.3758	0.3669	0.4171	0.5339	0.3753	0.3671	0.4163	0.5414	0.3847	0.3707	0.4011	0.544	0.3875	0.3709	0.3983	0.5108	0.3449	0.3704	0.4189	-0.17	0.834867	-0.0106667
CH2CH3	0.5266	0.3712	0.3699	0.383	0.5342	0.3759	0.3677	0.4156	0.5341	0.3756	0.3679	0.4148	0.5414	0.3847	0.3706	0.4013	0.5435	0.3869	0.37	0.398	0.5116	0.3452	0.3712	0.4192	-0.15	0.833067	-0.00886667
NHCOCH3	0.4968	0.2083	0.3691	0.3632	0.5296	0.376	0.3536	0.4262	0.528	0.3768	0.3508	0.4203	0.5413	0.3844	0.3703	0.3989	0.5433	0.3874	0.3692	0.3952	0.5075	0.3455	0.3652	0.4215	0	0.845333	-0.0211333
NMe2	0.4932	0.205	0.3624	0.3545	0.527	0.3745	0.3518	0.4358	0.5271	0.3746	0.3518	0.4369	0.5436	0.3885	0.3715	0.3979	0.5411	0.3854	0.3716	0.4006	0.5021	0.3392	0.3625	0.4297	-0.83	0.868267	-0.0440667
NH2	0.4962	0.2105	0.3663	0.3522	0.5257	0.3721	0.3509	0.4348	0.5258	0.3723	0.3509	0.4358	0.5436	0.3882	0.3709	0.3967	0.5415	0.3855	0.3717	0.3998	0.5036	0.3407	0.363	0.4293	-0.66	0.8666	-0.0424
F	0.4973	0.1231	0.3566	0.35	0.5328	0.3779	0.3509	0.4198	0.5323	0.3769	0.3507	0.4205	0.5449	0.3878	0.3688	0.396	0.5427	0.3864	0.3686	0.3992	0.5085	0.3456	0.3658	0.4207	0.06	0.840667	-0.0164667
OH	0.4942	0.1536	0.3578	0.3421	0.5311	0.3761	0.3509	0.4253	0.5262	0.3728	0.3508	0.4346	0.5422	0.386	0.3708	0.3989	0.5443	0.3885	0.3695	0.3967	0.5057	0.343	0.364	0.4256	-0.37	0.857	-0.0328
OCH3	0.4934	0.153	0.3556	0.3421	0.5273	0.3751	0.3516	0.4321	0.5318	0.3769	0.3527	0.4246	0.544	0.3882	0.3695	0.3967	0.5416	0.3844	0.371	0.4005	0.5061	0.3437	0.364	0.4255	-0.27	0.8548	-0.0306
SCH3	0.5563	0.3789	0.3933	0.4216	0.5284	0.3748	0.354	0.4232	0.532	0.3779	0.3552	0.4203	0.5442	0.3875	0.3701	0.3972	0.5412	0.3835	0.3704	0.4008	0.508	0.3448	0.3661	0.4221	0	0.843733	-0.0195333
NEt2	0.4939	0.2084	0.3639	0.3553	0.5249	0.3732	0.3509	0.4346	0.5249	0.3731	0.3508	0.4354	0.5434	0.3883	0.3713	0.3979	0.5402	0.3848	0.3713	0.4004	0.5018	0.339	0.3626	0.4304	-0.72	0.866933	-0.0427333
NHCH3	0.4954	0.2047	0.3636	0.3501	0.5253	0.3717	0.3505	0.4373	0.5257	0.3736	0.3502	0.4364	0.5418	0.3866	0.3721	0.3997	0.5427	0.3862	0.3709	0.3976	0.5027	0.3406	0.3615	0.4304	-0.7	0.8694	-0.0452
OCH(CH3)2	0.4918	0.153	0.3396	0.3536	0.5257	0.3752	0.3497	0.4308	0.5312	0.3754	0.3534	0.4252	0.5424	0.3861	0.3696	0.3972	0.5411	0.3852	0.3707	0.401	0.5049	0.3419	0.3638	0.4265	-0.45	0.855	-0.0308
C6F5	0.5155	0.3449	0.3754	0.4036	0.5355	0.3797	0.363	0.4062	0.5359	0.3797	0.3639	0.4071	0.5431	0.386	0.3684	0.3968	0.541	0.3842	0.369	0.4002	0.5137	0.3491	0.3716	0.4135	0.27	0.817867	0.00633333
OCH2CH2CH3	0.4926	0.1536	0.3552	0.3416	0.5255	0.3741	0.3512	0.4307	0.5319	0.3762	0.3531	0.4253	0.5437	0.3877	0.3696	0.397	0.542	0.386	0.3708	0.4007	0.5051	0.3418	0.3641	0.426	-0.25	0.854667	-0.0304667
Sn(CH3)3	0.6478	0.4099	0.3671	0.3969	0.5373	0.3803	0.3691	0.4123	0.5369	0.3796	0.3694	0.4133	0.5443	0.3867	0.37	0.3984	0.5421	0.3846	0.3704	0.4019	0.5134	0.346	0.3733	0.4164	0	0.828	-0.0038
C(CF3)3	0.5226	0.3358	0.3834	0.4161	0.5371	0.3854	0.3596	0.4038	0.5373	0.3853	0.36	0.4025	0.5433	0.3867	0.3672	0.3966	0.5408	0.3842	0.3672	0.3993	0.5139	0.3492	0.3736	0.4098	0.55	0.810733	0.0134667
OC6H5	0.497	0.152	0.3595	0.35	0.5313	0.378	0.3504	0.4253	0.5322	0.3774	0.3522	0.4225	0.5417	0.3855	0.3696	0.4001	0.5438	0.3873	0.3696	0.3965	0.5068	0.3437	0.3651	0.4242	-0.03	0.848	-0.0238
COCl	0.5155	0.3394	0.3752	0.4116	0.5437	0.3861	0.366	0.3962	0.5445	0.388	0.3658	0.3967	0.541	0.3847	0.3662	0.3994	0.5428	0.3845	0.3662	0.3954	0.5185	0.3529	0.3751	0.4053	0.61	0.7988	0.0254
